# Supplementary material for: Genetic ablation of the Bsx homeodomain transcription factor in zebrafish: Impact on mature pineal gland morphology and circadian behavior
Source: PubMed Central journal article supplement (PMC9285933; doi:10.1111/jpi.12795), 2022-03-31
Supplement: JPI-72-0-s001.pdf [file JPI-72-0-s001.pdf]

## SUPPLEMENTARY MATERIAL

**Table S1.** PCR primer sequences for genotyping

| Transcript  | Forward primer sequence (5'-3') | Reverse primer sequence (5'-3') |
|-------------|---------------------------------|---------------------------------|
| <i>bsx</i>  | ATTGCAAAGGAATGCAGATG            | ATTGTCGTCCAGCGTGTATCT           |
| <i>gfp</i>  | TTTTCAAGAGTGCCATGCC             | CCATGTGTAATCCCAGCAGC            |
| <i>egfp</i> | CAGATGAACTTCAGGGTCAG            | CTGCCGTCCTCGATGTTGTG            |

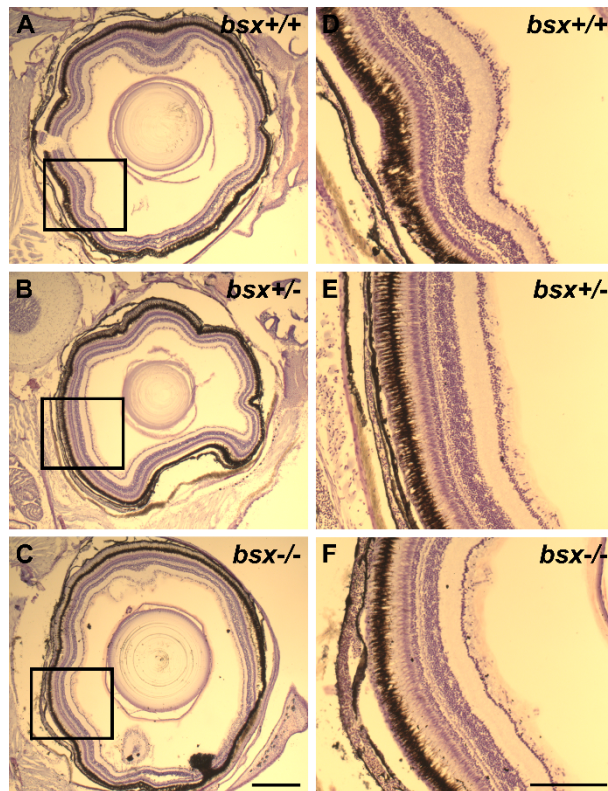

**Figure S1. Morphological structure of the retina is unaffected in adult *bsx*<sup>-/-</sup> mutant zebrafish.** Representative images of sagittal sections of *bsx*<sup>-/-</sup> mutant zebrafish eyes (C, F) stained in cresyl violet. Images on the right (D-F) represent the boxed regions on the left (A-C) at higher resolution. Wildtype (*bsx*<sup>+/+</sup>)(A, D) and heterozygote (*bsx*<sup>+/-</sup>)(B, E) controls are shown for comparison. For examined eyes, n=4 per genotype. Scale bars, 500 μm (left) and 200 μm (right).

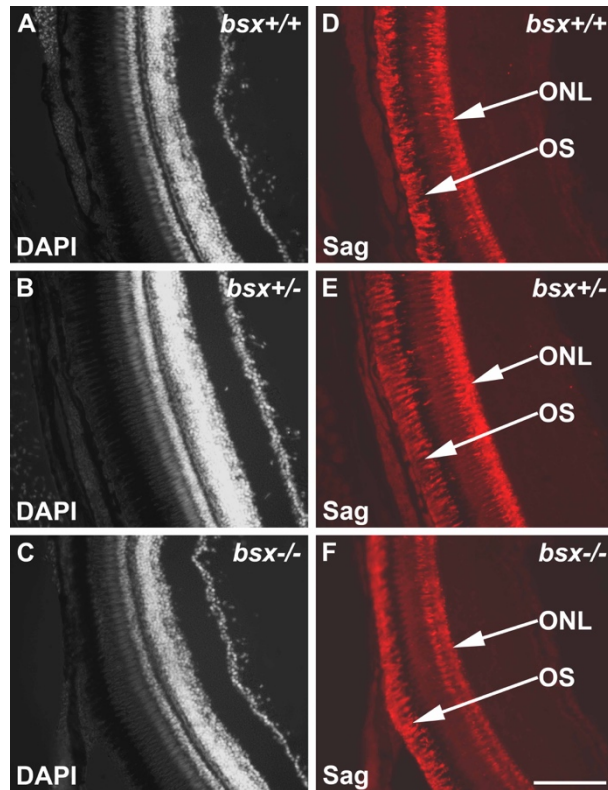

**Figure S2. S-antigen protein is present in the retina of adult *bsx*<sup>-/-</sup> mutant zebrafish.** Immunofluorescent staining for S-antigen (Sag) on sagittal sections of adult *bsx*<sup>-/-</sup> mutant zebrafish retina (F); sections were also stained in DAPI (C). Wildtype (*bsx*<sup>+/+</sup>)(A, D) and heterozygote (*bsx*<sup>+/-</sup>)(B, E) controls are shown for comparison. Scale bar, 100  $\mu$ m. ONL, outer nuclear layer, OS, photoreceptor outer segments.

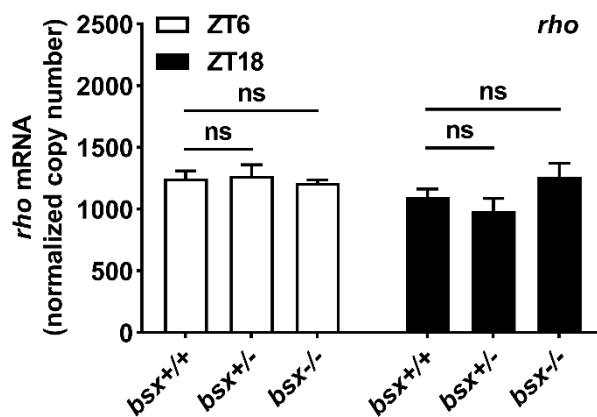

**Figure S3. Abundant *rho* transcript levels are maintained in whole eyes of adult *bsx*<sup>-/-</sup> mutant zebrafish.** Analyses of transcript levels of rhodopsin (*rho*) at daytime (ZT6) and nighttime (ZT18) as determined by qRT-PCR. Copy numbers were normalized to the geometric means of copy numbers of *eef1a1* and *actb2*, which were detected at high and stable levels in all samples; copy numbers were further divided by 10000 to account for abundance of transcripts. Two-way ANOVA did not detect significant effects of genotype or time of day. Transcript levels of homozygous (*bsx*<sup>-/-</sup>) and heterozygous (*bsx*<sup>+/-</sup>) mutants were compared to those of wildtype (*bsx*<sup>+/+</sup>) controls. Values on the graphs represent mean  $\pm$  SEM; n=4, where each sample is pooled tissue from 3 animals. P-values as determined by Dunnett's multiple comparisons test: ns, not significant. ZT, Zeitgeber time.
